# Supplementary material
Source: Copernicus journal article supplement (doi:10.5194/hess-30-4209-2026)
Supplement: Supplementary file 1 [file hess-30-4209-2026-supplement.pdf]

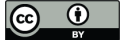

*Supplement of*

## **Combining traditional nutrient load analysis with storm hydrograph separation reveals concealed patterns in event-driven nutrient export in a rural headwater catchment**

**Lukas Ditzel et al.**

*Correspondence to:* Lukas Ditzel ([lukas.ditzel@uni-kassel.de](mailto:lukas.ditzel@uni-kassel.de))

The copyright of individual parts of the supplement might differ from the article licence.

Figure S1. Calibration curve for UV-VIS in situ instrument

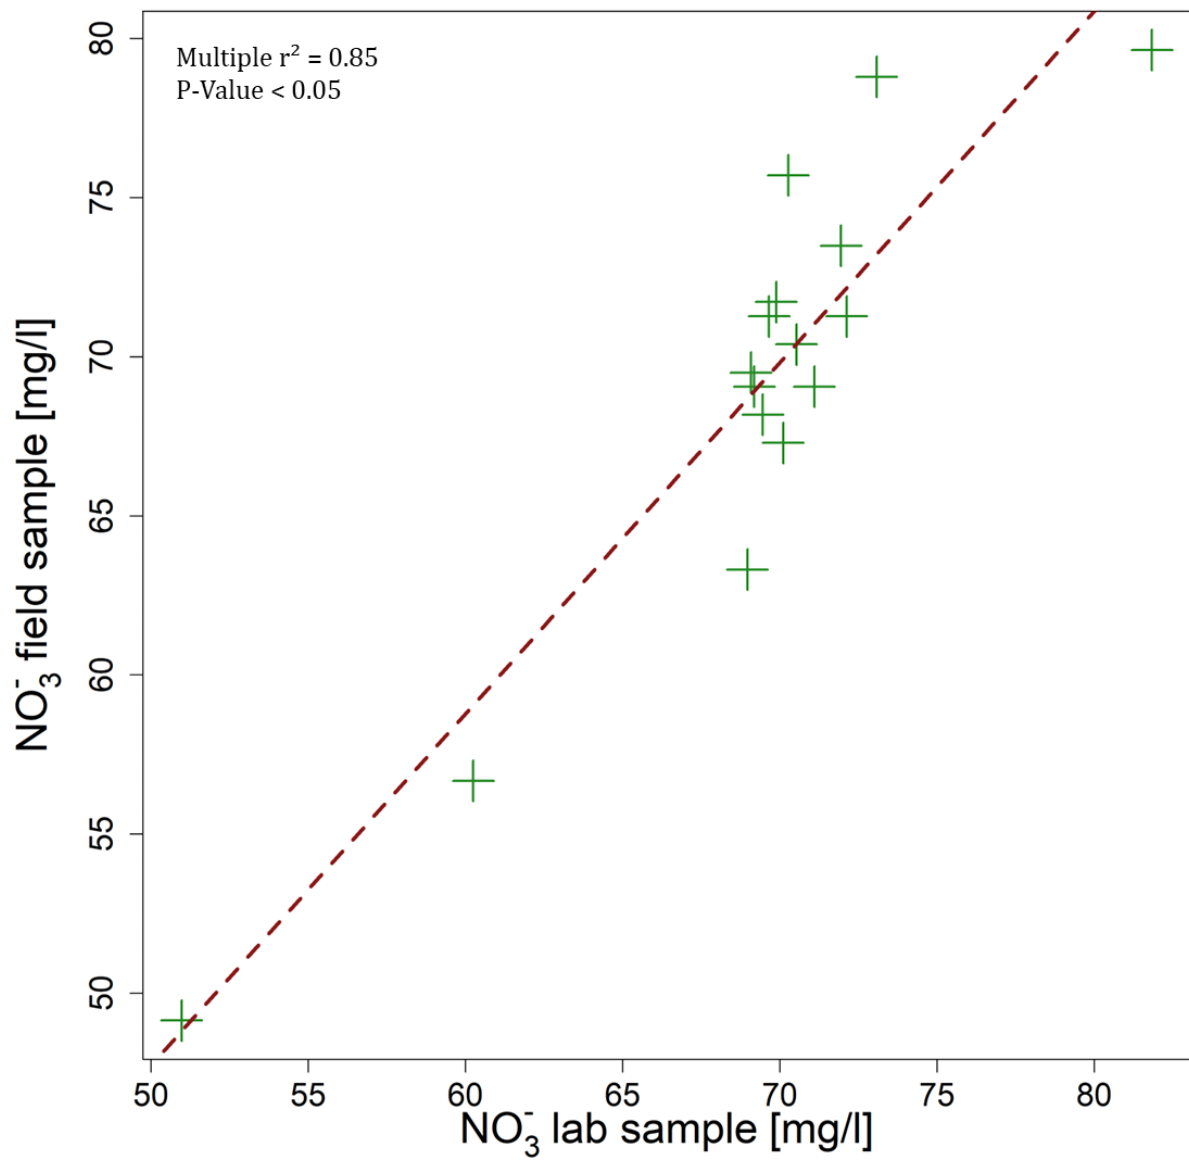

Figure S2. Flowchart of smoothing algorithm and example of execution

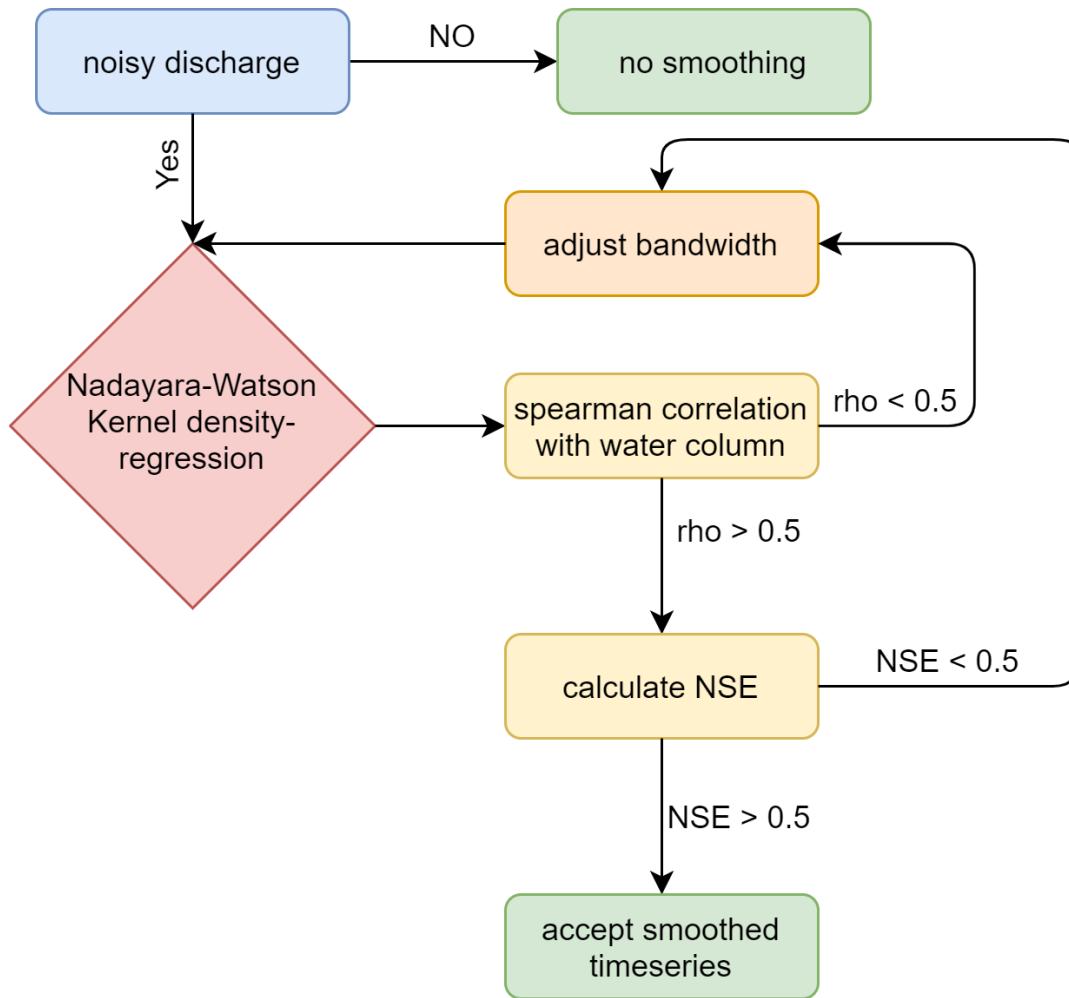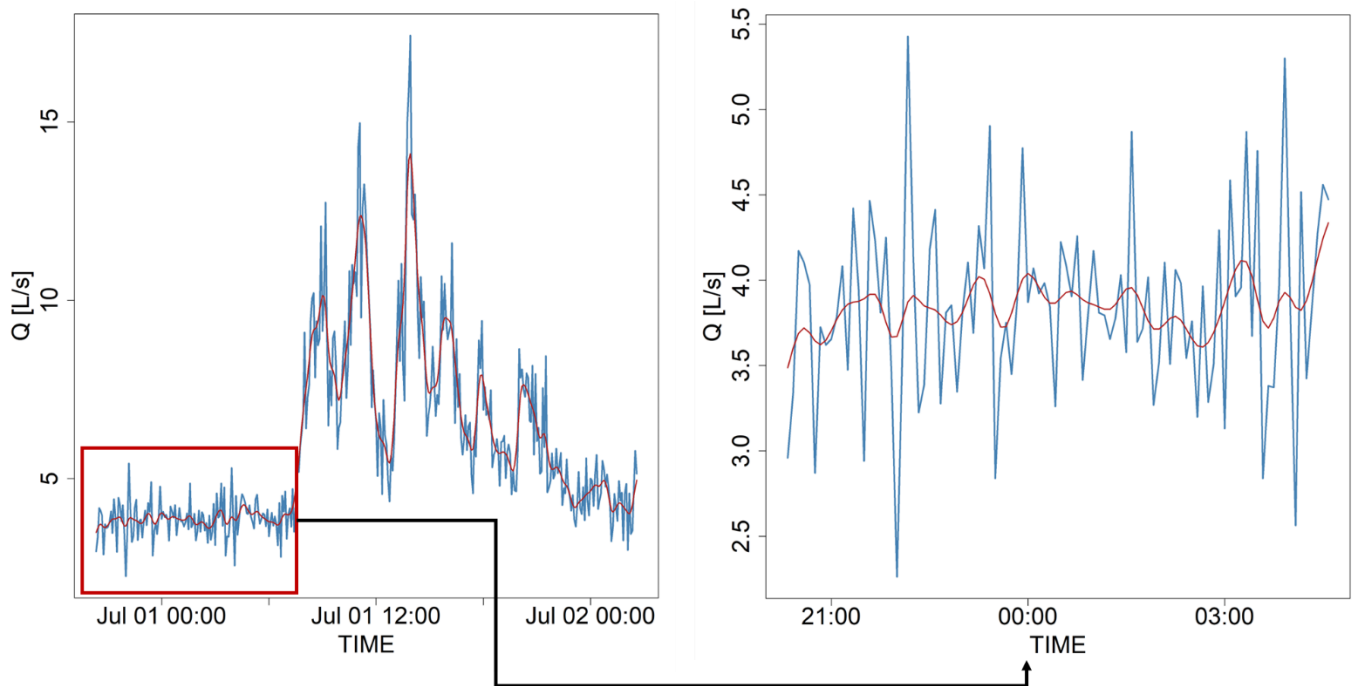

**Figure S3.** Local meteoric waterline

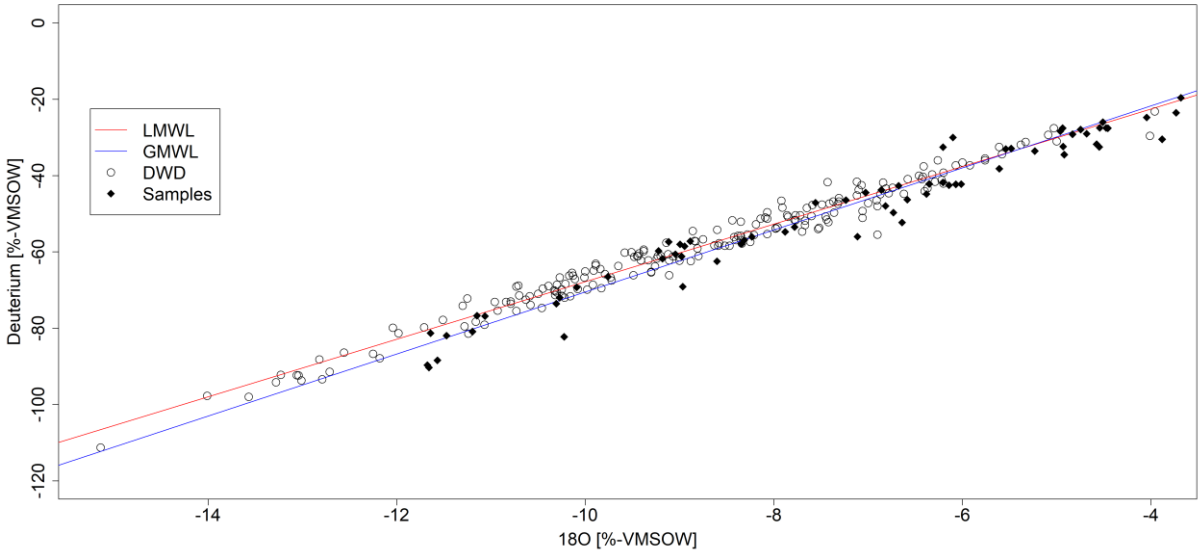

**Figure S4.** Scree plot example

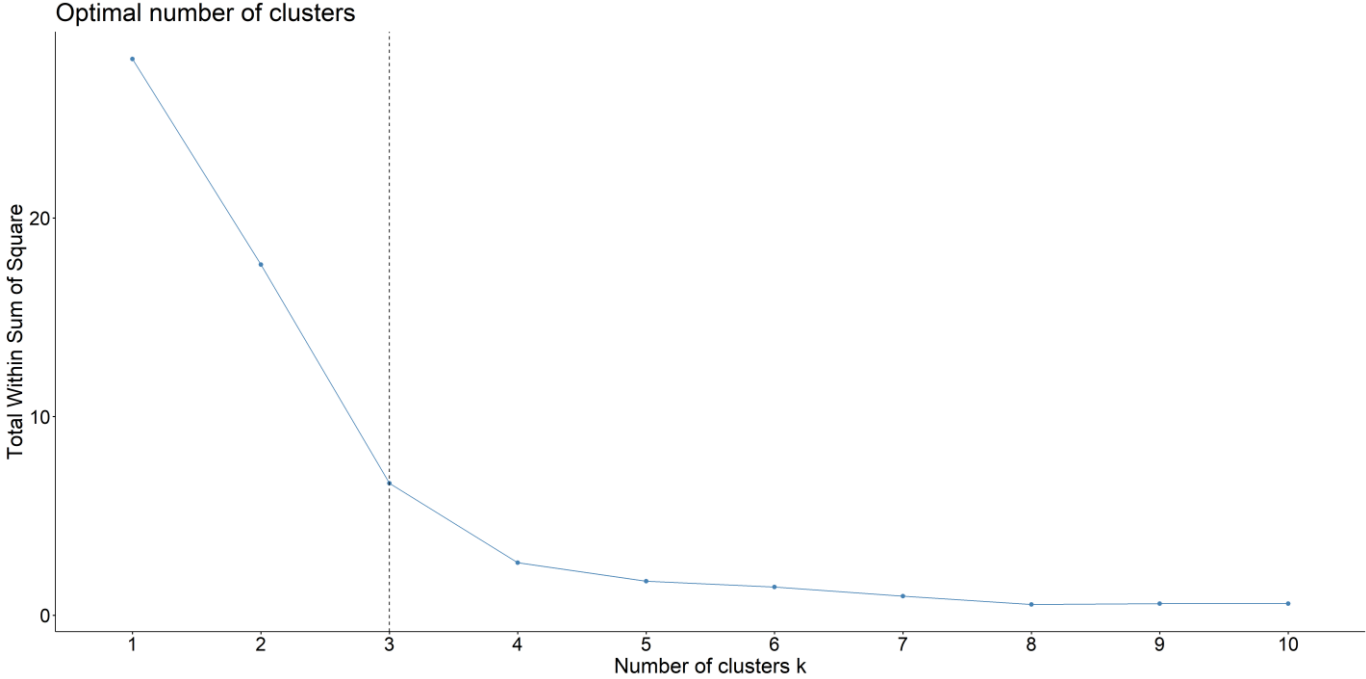

**Figure S5.** Discharge functions per cluster a) blue cluster, b) red cluster, c) green cluster.

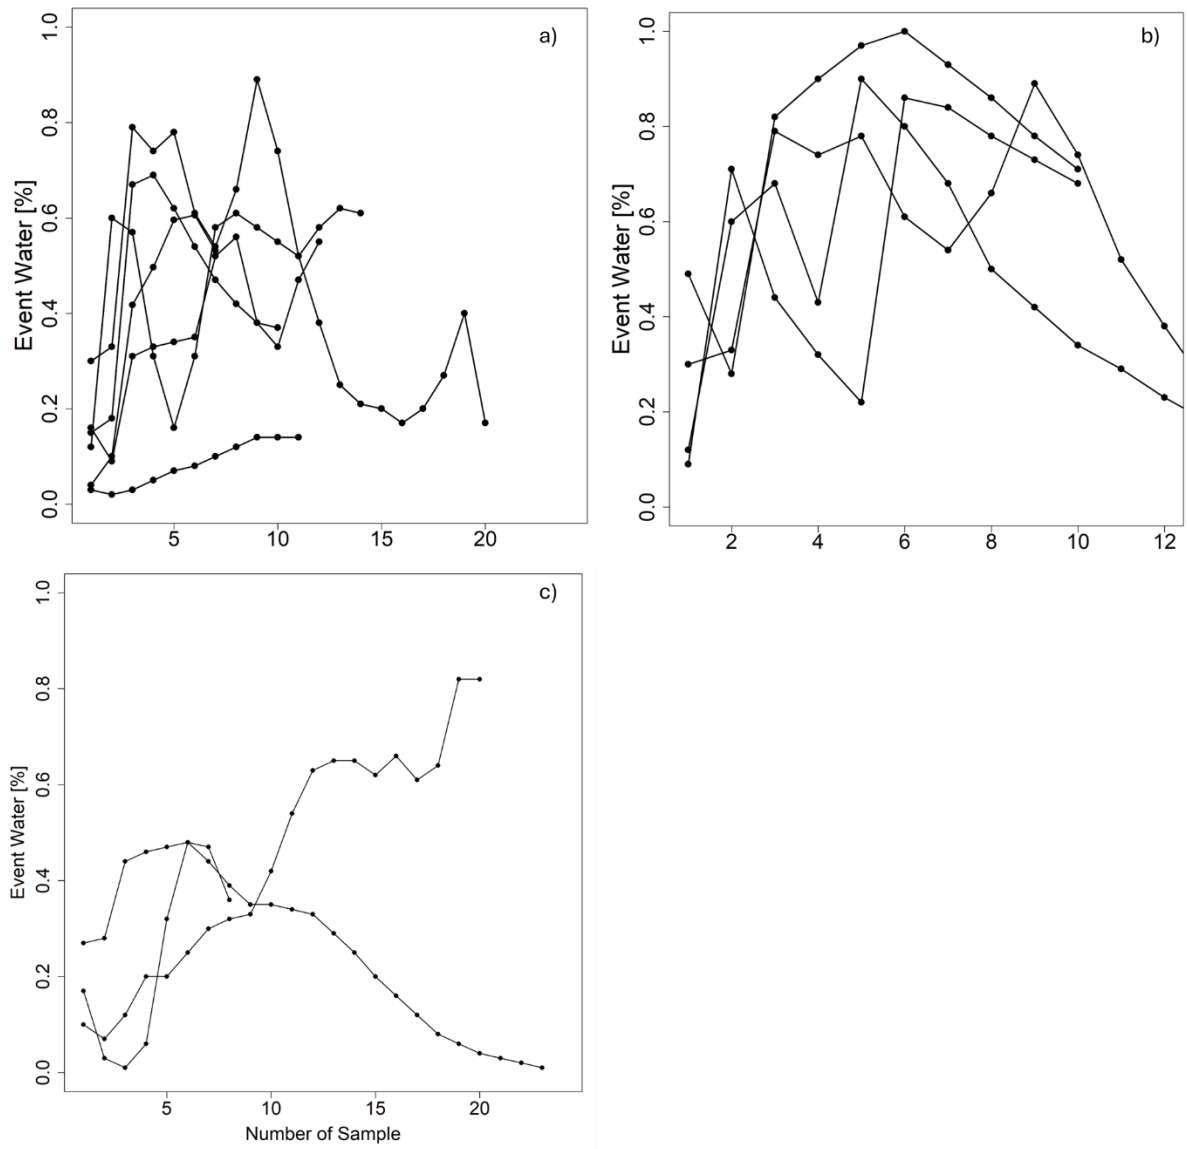

**Table S1.** Table of areas under the curve for each event and nutrients nitrate and P<sub>tot</sub>.

| <b>EVENT</b> | <b>Area NO<sub>3</sub><sup>-</sup> event</b> | <b>Area NO<sub>3</sub><sup>-</sup> total</b> | <b>Area P_event</b> | <b>Area P total</b> |
|--------------|----------------------------------------------|----------------------------------------------|---------------------|---------------------|
| 1            | 0.39                                         | 0.45                                         | 0.50                | 0.56                |
| 2            | 0.19                                         | 0.40                                         | 0.42                | 0.58                |
| 3            | 0.55                                         | 0.45                                         | 0.65                | 0.54                |
| 4            | 0.48                                         | 0.42                                         | 0.59                | 0.53                |
| 5            | 0.44                                         | 0.41                                         | 0.5                 | 0.46                |
| 6            | 0.53                                         | 0.50                                         | 0.54                | 0.51                |
| 7            | 0.60                                         | 0.47                                         | 0.59                | 0.46                |
| 8            | 0.56                                         | 0.52                                         | 0.40                | 0.38                |
| 9            | 0.52                                         | 0.48                                         | NA                  | NA                  |
| 10           | 0.72                                         | 0.57                                         | 0.77                | 0.62                |
| 11           | 0.28                                         | 0.40                                         | 0.54                | 0.62                |
| 12           | 0.70                                         | 0.50                                         | 0.75                | 0.56                |
| 13           | 0.12                                         | 0.33                                         | NA                  | NA                  |
